# Supplementary material for: Observation of intervalley quantum interference in epitaxial monolayer tungsten diselenide
Source: PubMed Central journal article supplement (PMC4569794; doi:10.1038/ncomms9180), 2015-09-01
Supplement: ncomms9180-s1.pdf [file ncomms9180-s1.pdf]

## Supplementary Figures

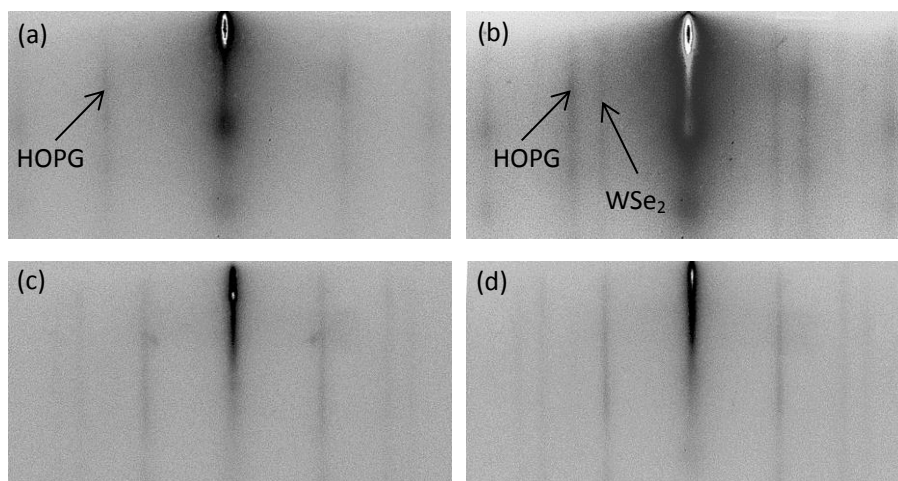

**Supplementary Figure 1: RHEED pattern evolution of WSe<sub>2</sub> growth** RHEED patterns were recorded at different deposition stages, from bare substrate to a film of 1.2 MLs, during MBE growth of WSe<sub>2</sub> on HOPG substrate. (a) is for a freshly treated HOPG substrate. (b) is for a surface after about 0.25 MLs WSe<sub>2</sub> being deposited, where the diffraction streaks of HOPG and WSe<sub>2</sub> coexist. (c) is for the as-grown 1.2 ML WSe<sub>2</sub> sample, and (d) shows the pattern of the same sample as (c) after annealing. The streaky pattern indicates smooth surfaces and the layer-by-layer growth mode. Annealing of the grown sample further improves the surface morphology as indicated by sharpening of the RHEED streaks and affirmed by the STM measurements (refer to Fig. 1 of the main text)

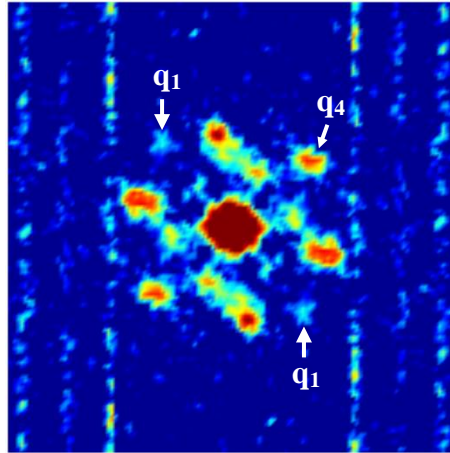

**Supplementary Figure 2: FT-STS map at 0.879 eV** Hint of inter-K valley scattering can be noted as labelled by  $q_1$ . As in the main text,  $q_4$  labels the inter-Q valley scattering.
